# Supplementary material for: Interpreting ambiguous ‘trace’ results in Schistosoma mansoni CCA Tests: Estimating sensitivity and specificity of ambiguous results with no gold standard
Source: PubMed Central journal article supplement (PMC5738141; doi:10.1371/journal.pntd.0006102), 2017-12-08

# Flow diagram for Cote d'Ivoire and Uganda

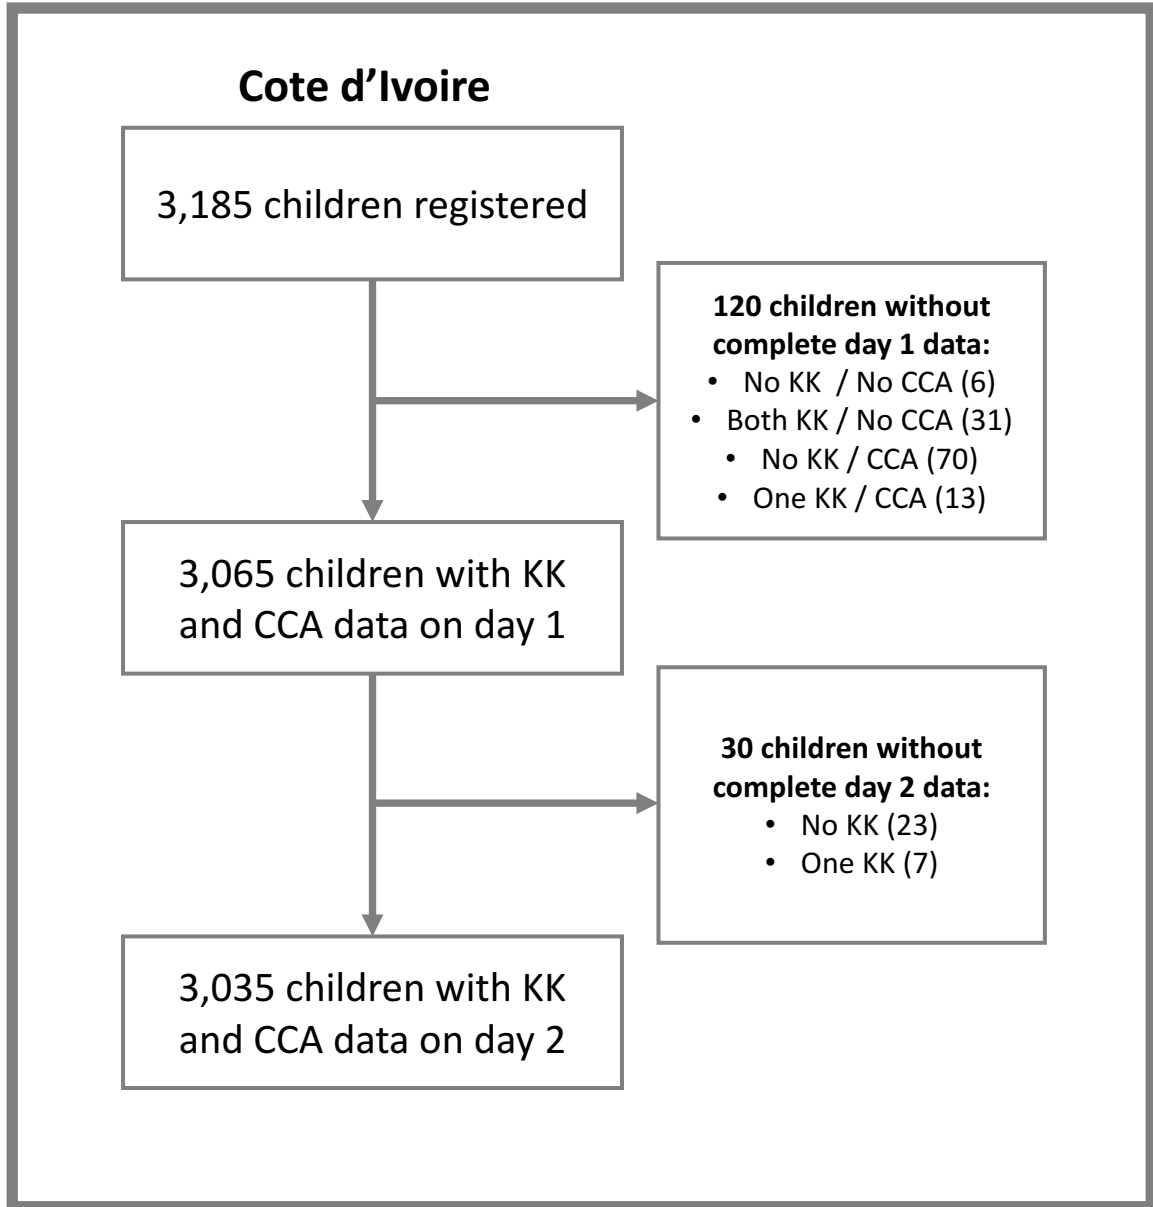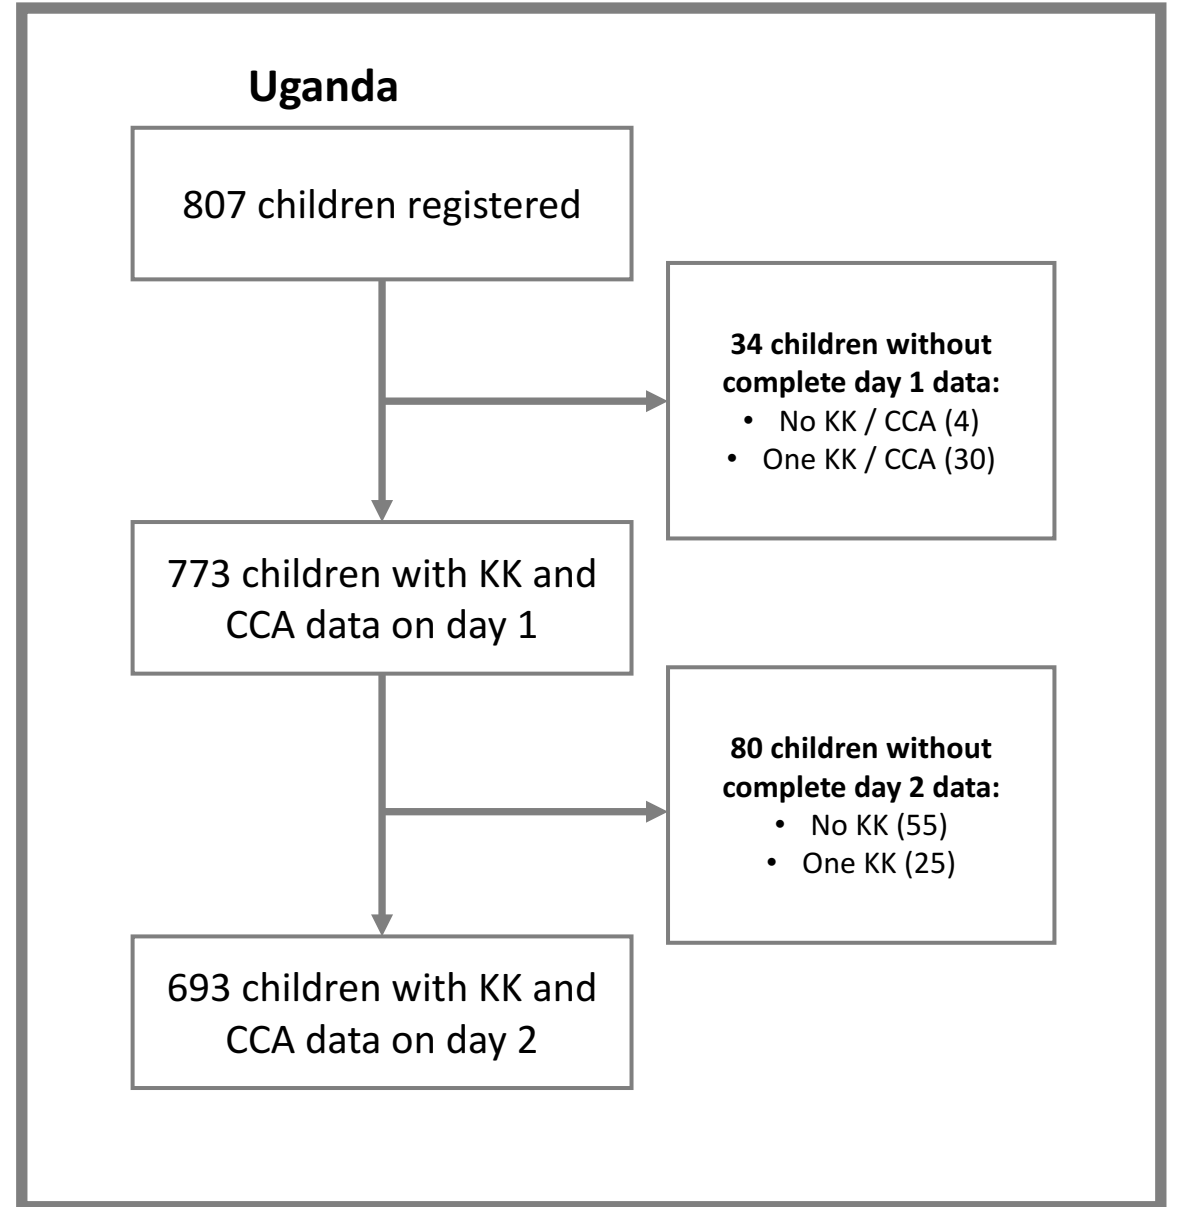

Supplement: pntd.0006102.s004.pdf [file pntd.0006102.s004.pdf]
